# Supplementary material
Source: PubMed Central journal article supplement (PMC8136619)
Supplement: NIHMS1697572-supplement-Supplemental_tables.pdf [file NIHMS1697572-supplement-Supplemental_tables.pdf]

Supplemental Table 1: Co-Morbidity and Medication Data

|                                                                                                                                                                                                                                                                                                                                                    | Adult         |                      | Pediatric       |                     |
|----------------------------------------------------------------------------------------------------------------------------------------------------------------------------------------------------------------------------------------------------------------------------------------------------------------------------------------------------|---------------|----------------------|-----------------|---------------------|
|                                                                                                                                                                                                                                                                                                                                                    | CPD<br>(n=19) | COVID-ARDS<br>(n=13) | MIS-C<br>(n=16) | Non MIS-C<br>(n=31) |
| <b>Co-Morbidities (%)</b>                                                                                                                                                                                                                                                                                                                          |               |                      |                 |                     |
| Asthma                                                                                                                                                                                                                                                                                                                                             | na            | 0                    | 4 (25%)         | 1 (3%)              |
| Current or Former Smoker                                                                                                                                                                                                                                                                                                                           | na            | 3 (23%)              | 0               | 0                   |
| Chronic Obstructive Pulmonary Disease                                                                                                                                                                                                                                                                                                              | na            | 2 (15%)              | 0               | 0                   |
| Chronic Neurologic Diseases and Dementia                                                                                                                                                                                                                                                                                                           | na            | 1 (7%)               | 0               | 0                   |
| Chronic Kidney Disease                                                                                                                                                                                                                                                                                                                             | na            | 0                    | 0               | 1 (3%)              |
| Diabetes                                                                                                                                                                                                                                                                                                                                           | na            | 4 (31%)              | 0               | 0                   |
| Hypertension                                                                                                                                                                                                                                                                                                                                       | na            | 4 (31%)              | 0               | 1 (3%)              |
| <b>Treatment<sup>a</sup></b>                                                                                                                                                                                                                                                                                                                       |               |                      |                 |                     |
| Convalescent Plasma                                                                                                                                                                                                                                                                                                                                | na            | 4 (31%)              | 0               | 0                   |
| Hydrocortisone                                                                                                                                                                                                                                                                                                                                     | na            | 6 (46%)              | 3 (19%)         | 0                   |
| Intravenous Immunoglobulin                                                                                                                                                                                                                                                                                                                         | na            | 0                    | 14 (88%)        | 2 (6%)              |
| Methylprednisone                                                                                                                                                                                                                                                                                                                                   | na            | 9 (69%)              | 15 (94%)        | 1 (3%)              |
| Monoclonal Antibody <sup>b</sup>                                                                                                                                                                                                                                                                                                                   | na            | 7 (54%)              | 3 (19%)         | 0                   |
| Remdesevir                                                                                                                                                                                                                                                                                                                                         | na            | 6 (40%)              | 1 (6%)          | 1 (3%)              |
| Abbreviations: CPD, convalescent plasma donor; ARDS, Acute Respiratory Distress Syndrome; MIS-C, Multisystem Inflammatory Syndrome in Children                                                                                                                                                                                                     |               |                      |                 |                     |
| a Samples obtained post treatment; Convalescent plasma (n=1 COVID-ARDS), Hydrocortisone (n=1 COVID-ARDS, n=3 MIS-C), Intravenous Immunoglobulin (n=6 MIS-C, n=0 Non MIS-C), Methylprednisone (n=8 COVID-ARDS, n=10 MIS-C, n=1 Non MIS-C), Monoclonal Antibodies (n=6 COVID-ARDS, n=1 MIS-C), Remdesevir (n=2 COVID-ARDS, n=1 MIS-C, n=1 Non MIS-C) |               |                      |                 |                     |
| b Received or enrolled in blinded trial; Anikinra (n=2 MIS-C), Eculizumab (n=1 MIS-C), Tocilizumab (n=5 COVID-ARDS, n=1 MIS-C), Sarilumab (n=2 COVID-ARDS)                                                                                                                                                                                         |               |                      |                 |                     |

Supplemental Table 2: Characteristics of Pediatric Non MIS-C Subjects

|                                                                     | Pediatric Non MIS-C Subjects (n=31) |
|---------------------------------------------------------------------|-------------------------------------|
| Clinical Presentation                                               |                                     |
| Surgical                                                            | 9 (29%)                             |
| COVID-19 Symptoms                                                   | 7 (23%)                             |
| Psychiatric                                                         | 4 (13%)                             |
| Trauma                                                              | 3 (10%)                             |
| Fever – non COVID                                                   | 2 (6%)                              |
| Other                                                               | 6 (19%)                             |
| Abbreviations: MIS-C, Multisystem Inflammatory Syndrome in Children |                                     |

Supplemental table 3: Multivariate analysis of anti-SARS-CoV-2 antibody measurements in this study.

| Variable                                   | Neutralizing Activity               |               |                      | Anti-S IgG                          |               |                      | Anti-S IgM                          |               |                      | Anti-N IgG                          |               |                      |
|--------------------------------------------|-------------------------------------|---------------|----------------------|-------------------------------------|---------------|----------------------|-------------------------------------|---------------|----------------------|-------------------------------------|---------------|----------------------|
|                                            | Regression Coefficient <sup>a</sup> | SE            | P value <sup>b</sup> | Regression Coefficient <sup>a</sup> | SE            | P value <sup>b</sup> | Regression Coefficient <sup>a</sup> | SE            | P value <sup>b</sup> | Regression Coefficient <sup>a</sup> | SE            | P value <sup>b</sup> |
| <b>Combined adult and pediatric (n=79)</b> |                                     |               |                      |                                     |               |                      |                                     |               |                      |                                     |               |                      |
| Time post symptom onset                    | 0.0056                              | 0.0044        | 0.2083               | <b>0.0255</b>                       | <b>0.0076</b> | <b>0.0015</b>        | 0.0149                              | 0.0136        | 0.2779               | -0.0061                             | 0.0057        | 0.2870               |
| Male                                       | -0.0015                             | 0.1002        | 0.9884               | 0.2426                              | 0.1747        | 0.1703               | <b>0.6404</b>                       | <b>0.3125</b> | <b>0.0450</b>        | 0.0872                              | 0.1296        | 0.5037               |
| ARDS                                       | <b>0.4317</b>                       | <b>0.1423</b> | <b>0.0036</b>        | <b>1.5280</b>                       | <b>0.2482</b> | <b>&lt;0.0001</b>    | <b>1.8680</b>                       | <b>0.4439</b> | <b>&lt;0.0001</b>    | 0.0242                              | 0.1841        | 0.8961               |
| MIS-C                                      | 0.0765                              | 0.1788        | 0.6705               | <b>1.0390</b>                       | <b>0.3118</b> | <b>0.0015</b>        | 0.8714                              | 0.5576        | 0.1235               | -0.2938                             | 0.2313        | 0.2091               |
| Pediatric                                  | <b>-0.3181</b>                      | <b>0.1311</b> | <b>0.0184</b>        | -0.3797                             | 0.2285        | 0.1021               | <b>-0.9692</b>                      | <b>0.4087</b> | <b>0.0211</b>        | <b>-0.4703</b>                      | <b>0.1696</b> | <b>0.0074</b>        |
| <b>Adult subjects (n=32)</b>               |                                     |               |                      |                                     |               |                      |                                     |               |                      |                                     |               |                      |
| Age                                        | -0.0018                             | 0.0043        | 0.6853               | -0.0069                             | 0.0082        | 0.4076               | -0.0063                             | 0.0161        | 0.6968               | 0.0128                              | 0.0065        | 0.0600               |
| Time post symptom onset                    | 0.0092                              | 0.0083        | 0.2775               | 0.0272                              | 0.0159        | 0.0982               | 0.0257                              | 0.0311        | 0.4172               | -0.0120                             | 0.0126        | 0.3491               |
| Male                                       | 0.0508                              | 0.1585        | 0.7511               | 0.1975                              | 0.3041        | 0.5215               | 0.7707                              | 0.5962        | 0.2071               | -0.0018                             | 0.2416        | 0.9942               |
| ARDS                                       | <b>0.4632</b>                       | <b>0.1751</b> | <b>0.0134</b>        | <b>1.6120</b>                       | <b>0.3359</b> | <b>&lt;0.0001</b>    | <b>1.9780</b>                       | <b>0.6584</b> | <b>0.0057</b>        | -0.1029                             | 0.2668        | 0.7029               |
| <b>Pediatric subjects (n=47)</b>           |                                     |               |                      |                                     |               |                      |                                     |               |                      |                                     |               |                      |
| Age                                        | <b>-0.0268</b>                      | <b>0.0124</b> | <b>0.0394</b>        | -0.0360                             | 0.0188        | 0.0661               | -0.0363                             | 0.0269        | 0.1889               | -0.0008                             | 0.0085        | 0.9295               |
| Time post symptom onset                    | 0.0016                              | 0.0049        | 0.7407               | <b>0.0219</b>                       | <b>0.0074</b> | <b>0.0064</b>        | 0.0057                              | 0.0106        | 0.5965               | -0.0008                             | 0.0033        | 0.8179               |
| Male                                       | -0.0600                             | 0.1246        | 0.6344               | 0.2888                              | 0.1894        | 0.1388               | 0.4898                              | 0.2709        | 0.0817               | 0.1750                              | 0.0854        | 0.0503               |
| MIS-C                                      | -0.0722                             | 0.1843        | 0.6985               | <b>0.9261</b>                       | <b>0.2800</b> | <b>0.0027</b>        | 0.5393                              | 0.4006        | 0.1894               | -0.1206                             | 0.1263        | 0.3479               |

Abbreviations: ARDS, Acute Respiratory Distress Syndrome; MIS-C, Multisystem Inflammatory Syndrome in Children; SE, standard error.

<sup>a</sup>Results shown are from multiple linear regression models (least squares regression type) in which the outcome variables are neutralizing activity, abundance of anti-S IgG, anti-S IgM or anti-N IgG. For each variable,

<sup>b</sup>P values were calculated using the *t* statistic with two-sided hypothesis testing. The unadjusted P values are reported.
